# Supplementary material
Source: MDPI journal article supplement (https://www.mdpi.com/2073-4344/13/3/531)
Supplement: s1 [file s1]

# Methane Activation and Coupling Pathways on Ni<sub>2</sub>P Catalyst

Abdulrahman Almithn \*, Salem N. Alghanim, Abdullah A. Mohammed, Abdullah K. Alghawinim, Mazen A. Alomaireen, Zaid Alhulaybi, SK Safdar Hossain

Department of Chemical Engineering, College of Engineering, King Faisal University, Al Ahsa 31982, Saudi Arabia

\* Correspondence: aalmithn@kfu.edu.sa (A.A.)

## S1. Details of density functional calculations of thermochemical properties

Frequency calculations were performed on gas phase molecules and all optimized adsorbed species to determine zero-point vibrational energies (ZPVE), and vibrational, translational and rotational enthalpy and free energy. These terms were then used, together with electronic energies ( $E_0$ , provided by VASP), to estimate enthalpies ( $H$ )

$$H = E_0 + \text{ZPVE} + H_{\text{vib}} + H_{\text{trans}} + H_{\text{rot}} \quad (\text{S1})$$

and free energies ( $G$ )

$$G = E_0 + \text{ZPVE} + G_{\text{vib}} + G_{\text{trans}} + G_{\text{rot}} \quad (\text{S2})$$

for reactants, products, and transition states at 1123 K. For calculations which include a periodic surface, there are no translational or rotational degrees of freedom and DFT-derived vibrational frequencies can be used to determine the ZPVE,  $H_{\text{vib}}$ , and  $G_{\text{vib}}$

$$\text{ZPVE} = \sum_i (\frac{1}{2} \nu_i h) \quad (\text{S3})$$

$$H_{\text{vib}} = \sum_i \left( \frac{\nu_i h e^{-\frac{\nu_i h}{kT}}}{1 - e^{-\frac{\nu_i h}{kT}}} \right) \quad (\text{S4})$$

$$G_{\text{vib}} = \sum_i \left( -kT \ln \frac{1}{1 - e^{-\frac{\nu_i h}{kT}}} \right) \quad (\text{S5})$$

For gaseous molecules, translational and rotational enthalpies and free energies were also computed from statistical mechanics:

$$H_{\text{trans}} = \frac{5}{2} kT \quad (\text{S6})$$

$$H_{\text{rot,linear}} = kT \quad (\text{S7})$$

$$H_{\text{rot,nonlinear}} = \frac{3}{2} kT \quad (\text{S8})$$

$$G_{\text{trans}} = -kT \ln \left[ \left( \frac{2\pi M kT}{h^2} \right)^{3/2} V \right] \quad (\text{S9})$$

$$G_{\text{rot}} = -kT \ln \left[ \frac{\pi^{1/2}}{\sigma} \left( \frac{T^3}{\theta_x \theta_y \theta_z} \right)^{1/2} \right] \quad (\text{S10})$$

$$\theta_i = \frac{h^2}{8\pi^2 I_i k} \quad (\text{S11})$$

where  $I_i$  is the moment of inertia about axes  $x$ ,  $y$  or  $z$  and  $\sigma$  is the symmetry number of the molecule (2 for H<sub>2</sub> and 6 for C<sub>2</sub>H<sub>6</sub>). Equations S10–S12 obtained from: McQuarrie, D. A.; Statistical Mechanics; Sausolito, CA.

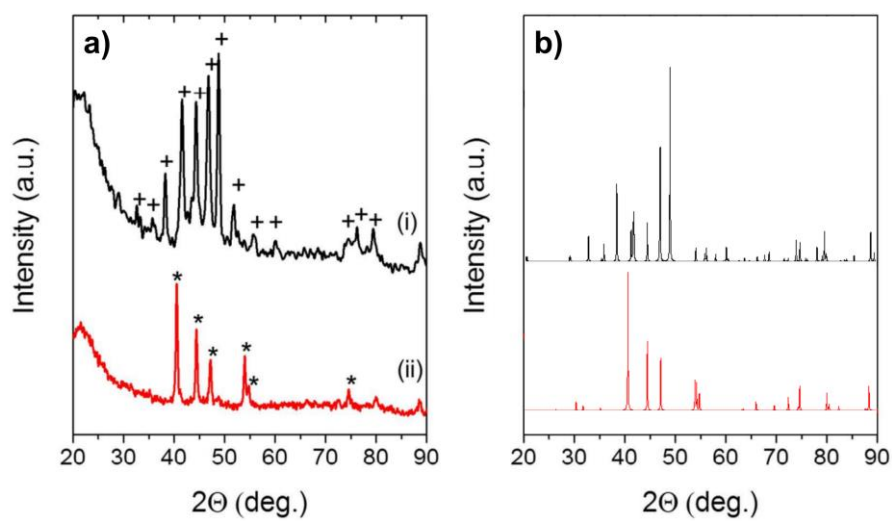

**Figure S1.** (a) Experimental and (b) DFT-simulated XRD patterns of bulk  $\text{Ni}_2\text{P}$  (red) and  $\text{Ni}_{12}\text{P}_5$  (black).

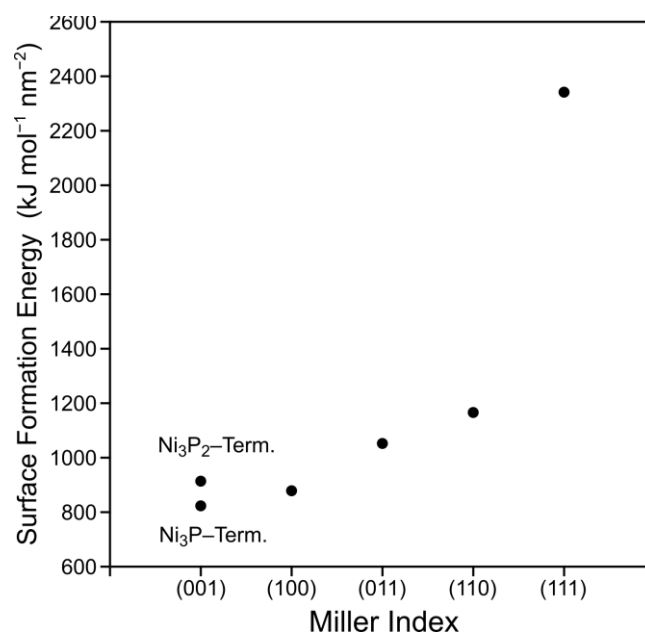

**Figure S2.** DFT-derived surface formation energy for Ni<sub>2</sub>P. Lower surface formation energy indicates more stable surface.

The bulk Ni<sub>2</sub>P structure was cleaved along different Miller indices and the surface formation energy was calculated by

$$E = \left( E_{surf} - \frac{N_{surf}}{N_{bulk}} E_{bulk} \right) \frac{1}{2A} \quad (1)$$

where N is the number of atoms and A is the area of the surface. For the Ni<sub>2</sub>P(001), surface there is an alternation of planes in the z direction that have different Ni and P composition: 1) Ni<sub>3</sub>P and 2) Ni<sub>3</sub>P<sub>2</sub>.
